# Supplementary material for: Indirect reciprocity can overcome free-rider problems on costly moral assessment
Source: PubMed Central journal article supplement (PMC4971172; doi:10.1098/rsbl.2016.0341), 2016-07
Supplement: rsbl20160341supp1.pdf [file rsbl20160341supp1.pdf]

**Electronic supplementary material for:**  
Indirect reciprocity can overcome free-rider problems  
on costly moral assessment

Tatsuya Sasaki, Isamu Okada, Yutaka Nakai

**S1. Simple standing and stern judging with first-stage assessment errors**

We examine assessment errors for the first stage of the variant model considered in the main text. We explore the conditions for the homogeneous state of paying discriminators [Z] with  $z = 1$  to become stable under simple standing and stern judging. We check when paying discriminators become better off than the other three strategies: cooperators, defectors and evading discriminators.

First, we analyse the frequency of good and nice players among  $S$ -strategists ( $S = X, Y, Z$  or  $W$ ),  $g_s$ . As in the main text, we assume that the degree of  $g_s$  is unchanged between the consecutive one-round (two-stage) games. We note that by definition the only difference between the rules is with respect to how a potential donor is to be assessed when a potential recipient is bad or nasty and the donor's action is not to help, in which case simple standing assigns a good image and stern judging a bad image.

We denote by  $e_1$  the probability of a first-stage assessment error in which the assessment system involuntarily assesses a paying player (who should have been nice) as nasty or an evading player (who should have been nasty) as nice.

For simple standing,  $g_s$  is given by

$$\begin{aligned} g_x &= e_1[(1 - e_2)g + (1 - g)], \\ g_y &= e_1[0 \cdot g + (1 - g)], \\ g_z &= (1 - e_1)[(1 - e_2)g + (1 - g)], \\ g_w &= e_1[(1 - e_2)g + (1 - g)], \end{aligned} \tag{S1}$$

in which  $g$  denotes the frequency of players who have both a good and nice image over the whole population, thus  $g = xg_x + yg_y + zg_z + wg_w$ , and  $e_2$  describes the probability of an implementation error in the second stage (see the main text for details). In equation (S1), the

evading players (with X, Y or W) and the paying players (with Z) are assessed as nice with probability  $e_1$  and  $1 - e_1$ , respectively, in the first stage. In addition, the bracket terms of the right side describe the probability that a donor with strategy  $S$  is assessed as good in the second-stage giving game. When a recipient has a good and nice image (with probability  $g$ ), X, Z and W strategists are willing to help and are assessed as good with probability  $(1 - e_2)g$  and Y strategists refuse to help, thus receiving a bad image. Simple standing is a tolerant norm, which is to assign a good image to a donor, irrespective of his/her actions to a recipient who has a bad or nasty image. This leads to the same second term in the bracket as  $1 - g$  over all  $g_S$ .

Then, for stern judging, equation (S1) becomes

$$\begin{aligned}
g_X &= e_1[(1 - e_2)g + e_2(1 - g)], \\
g_Y &= e_1[0 \cdot g + (1 - g)], \\
g_Z &= (1 - e_1)[(1 - e_2)g + (1 - g)], \\
g_W &= e_1[(1 - e_2)g + (1 - g)].
\end{aligned} \tag{S2}$$

Stern judging assigns a good image to those who refuse to help a bad or nasty recipient and a bad image to those who help a bad or nasty recipient. This leads to the second term in the bracket for  $g_X$ ,  $e_2(1 - g)$ , which is the only difference from simple standing in equation (S1).

We analyse the expected payoff  $P_S$  at the point  $z = 1$ . Equation (1) in the main text is specified as:

$$\begin{aligned}
P_X &= (1 - e_2)bg_X - (1 - e_2)c, \\
P_Y &= (1 - e_2)bg_Y, \\
P_Z &= (1 - e_2)bg_Z - (1 - e_2)cg - k, \\
P_W &= (1 - e_2)bg_W - (1 - e_2)cg.
\end{aligned} \tag{S3}$$

Considering equations (S1) to (S3), it is obvious that  $P_W$  is greater than or equal to  $P_X$ . Thus, if  $P_Z - P_W|_{z=1} > 0$  holds, this yields  $P_Z - P_X|_{z=1} > 0$ .

By solving equations (S1) and (S2) for  $z = 1$ , we obtain, in either case of simple standing or stern judging,

$$g|_{z=1} = g_z|_{z=1} = \frac{1-e_1}{1+e_2(1-e_1)}. \quad (\text{S4})$$

Substituting equation (S4) into equations (S1) to (S3) yields

$$P_z - P_y|_{z=1} = \frac{b(1-e_2)[1-(1+e_2)e_1 - (1-e_2)e_1^2] - c(1-e_1)(1-e_2)}{1+e_2(1-e_1)} - k, \quad (\text{S5})$$

and

$$P_z - P_w|_{z=1} = \frac{b(1-e_2)(1-2e_1)}{1+e_2(1-e_1)} - k. \quad (\text{S6})$$

Equations (S5) and (S6) (which give the stability threshold conditions) for  $z = 1$  are common throughout simple standing and stern judging.

As the degree of the first-stage assessment error  $e_1$  goes to 0, equations (S5) and (S6) converge to  $\frac{1-e_2}{1+e_2}(b-c) - k$  and  $\frac{1-e_2}{1+e_2}b - k$ , respectively. Therefore, equation (5) in the main text,

$$\frac{1-e_2}{1+e_2}(b-c) - k > 0,$$

is sufficient for  $z = 1$  to also be stable for a sufficiently small degree of  $e_1$  in either case of simple standing or stern judging.
